# Supplementary material for: Radiation-induced extracellular vesicle (EV) release of miR-603 promotes IGF1-mediated stem cell state in glioblastomas
Source: PubMed Central journal article supplement — eBioMedicine. 2020 Apr 28;55:102736. doi: 10.1016/j.ebiom.2020.102736 (PMC7195524; doi:10.1016/j.ebiom.2020.102736), 2020-04-28
Supplement: mmc1.pdf [file mmc1.pdf]

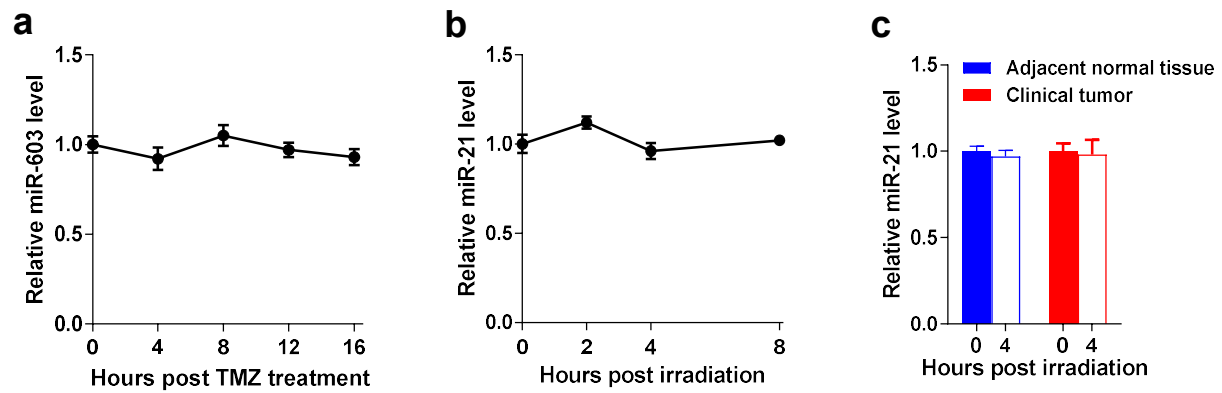

**Fig S1. Related to Figure 1. Effects of ionizing radiation and TMZ treatment on miR-603 level in glioblastoma.**

(a) TMZ treatment did not alter miR-603 level in glioblastoma cells. Effect of TMZ on the level of miR-603 in LN340 cell line was detected using qPCR at the indicated times.

(b) Ionizing radiation did not alter miR-21 level in glioblastoma cells. Effect of IR on the level of miR-603 in LN340 cell line was detected using qPCR at the indicated times.

(c) IR did not change miR-21 level in glioblastoma tissue compared to adjacent normal tissue. miR-21 level was measured using qPCR in freshly resected human glioblastoma specimens or adjacent normal tissue after receiving 2 Gy radiation. Error bars represent SE.

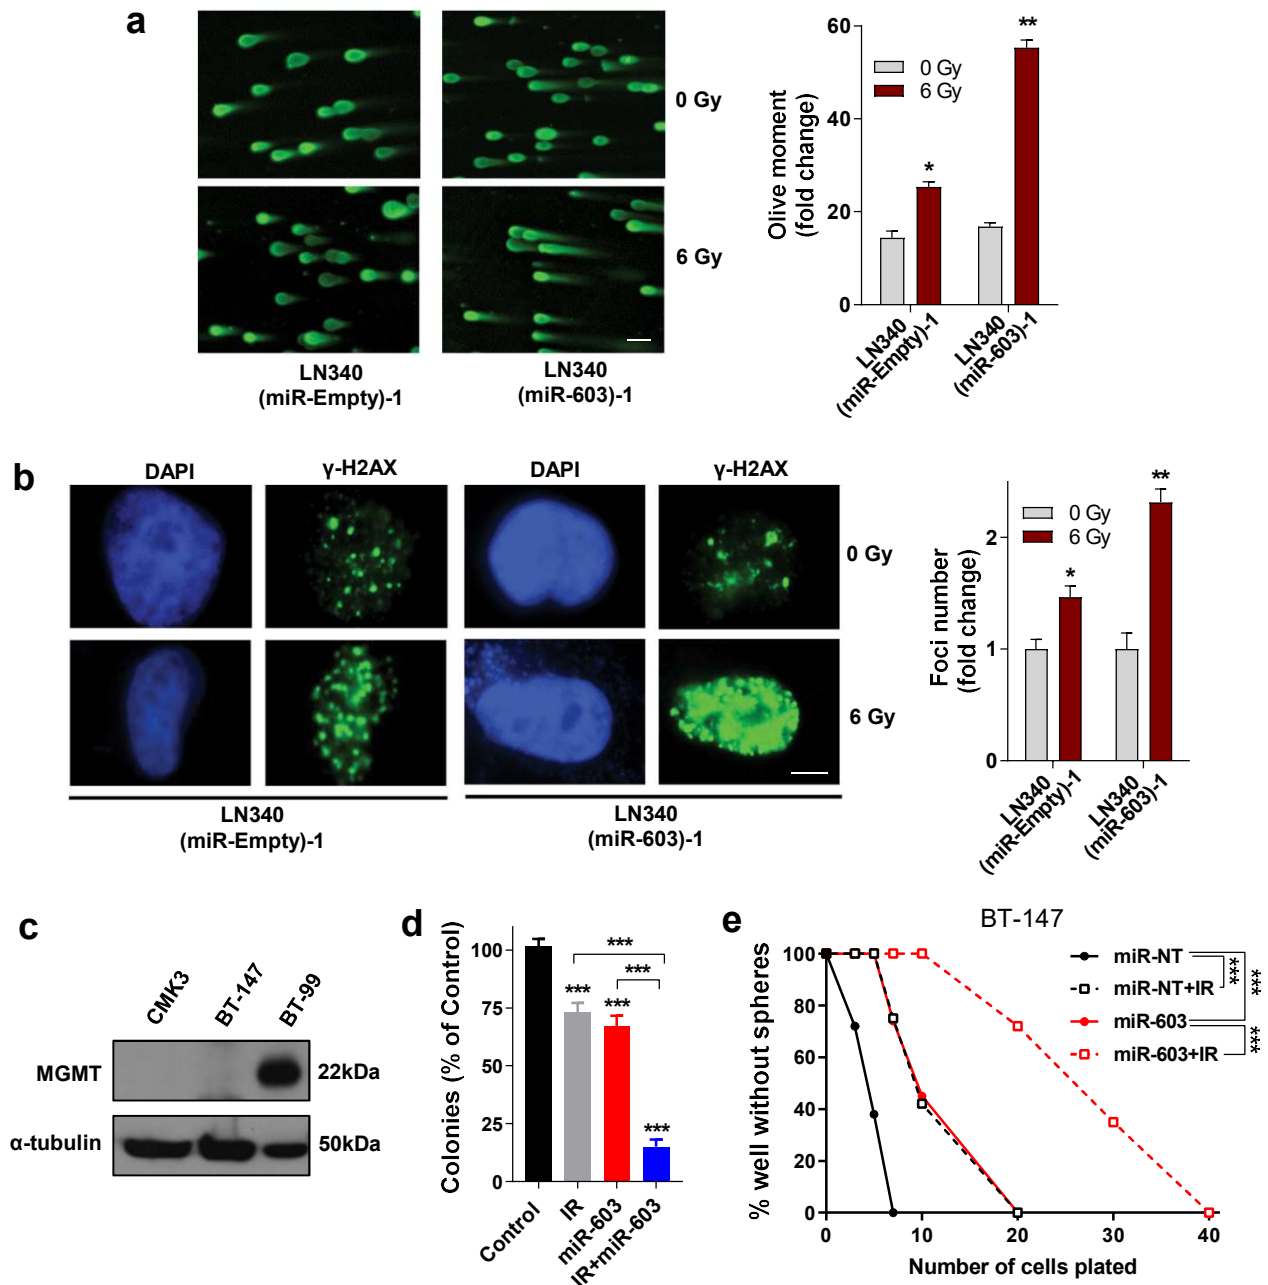

**Fig S2. Related to Figure 3. Ectopic miR-603 expression increases radiation sensitivity in GBM cells.**

(a) Comet assay was performed in LN340(miR-Empty)-1 and LN340(miR-603)-1 cells (unirradiated or received 6 Gy radiation). Representative images of olive moments (left panel) and olive moments quantification (right panel) are shown. \* $p < 0.05$  and \*\* $p < 0.01$  indicate statistically significant differences compared to 0 Gy control group in the same cell line (Student's  $t$  test). Scale bar, 50  $\mu\text{m}$ .

(b) Representative immunofluorescence staining images of  $\gamma$ -H2AX foci in LN340(miR-Empty)-1 and LN340(miR-603)-1 cells with or without 6 Gy radiation (left panel).  $\gamma$ -H2AX foci in those cells were quantified (right panel). \* $p < 0.05$  and \*\* $p < 0.01$  indicate statistically significant differences compared to 0 Gy control group in the same cell line (Student's  $t$  test). Scale bar, 5  $\mu\text{m}$ .

(c) MGMT protein expression levels were measured by western blot in CMK3, BT-147, and BT-99 cells.  $\alpha$ -Tubulin was used as the loading control.

(d) Colony formation assay was performed in U87MG cells transfected with miR-603 mimic or the mimic control. \*\*\* $p < 0.001$  between indicated groups (one-way ANOVA).

(e) miR-603 sensitized patient-derived glioblastoma cells to IR. Clonogenic potential of BT-147 cells (propagated as neurospheres) was determined using limiting dilution assay. BT-147 cells were transfected with human miR-603 mimic or non-targeting control miRNA before IR treatment. \*\*\* $p < 0.001$  between indicated groups (Chi-square test).

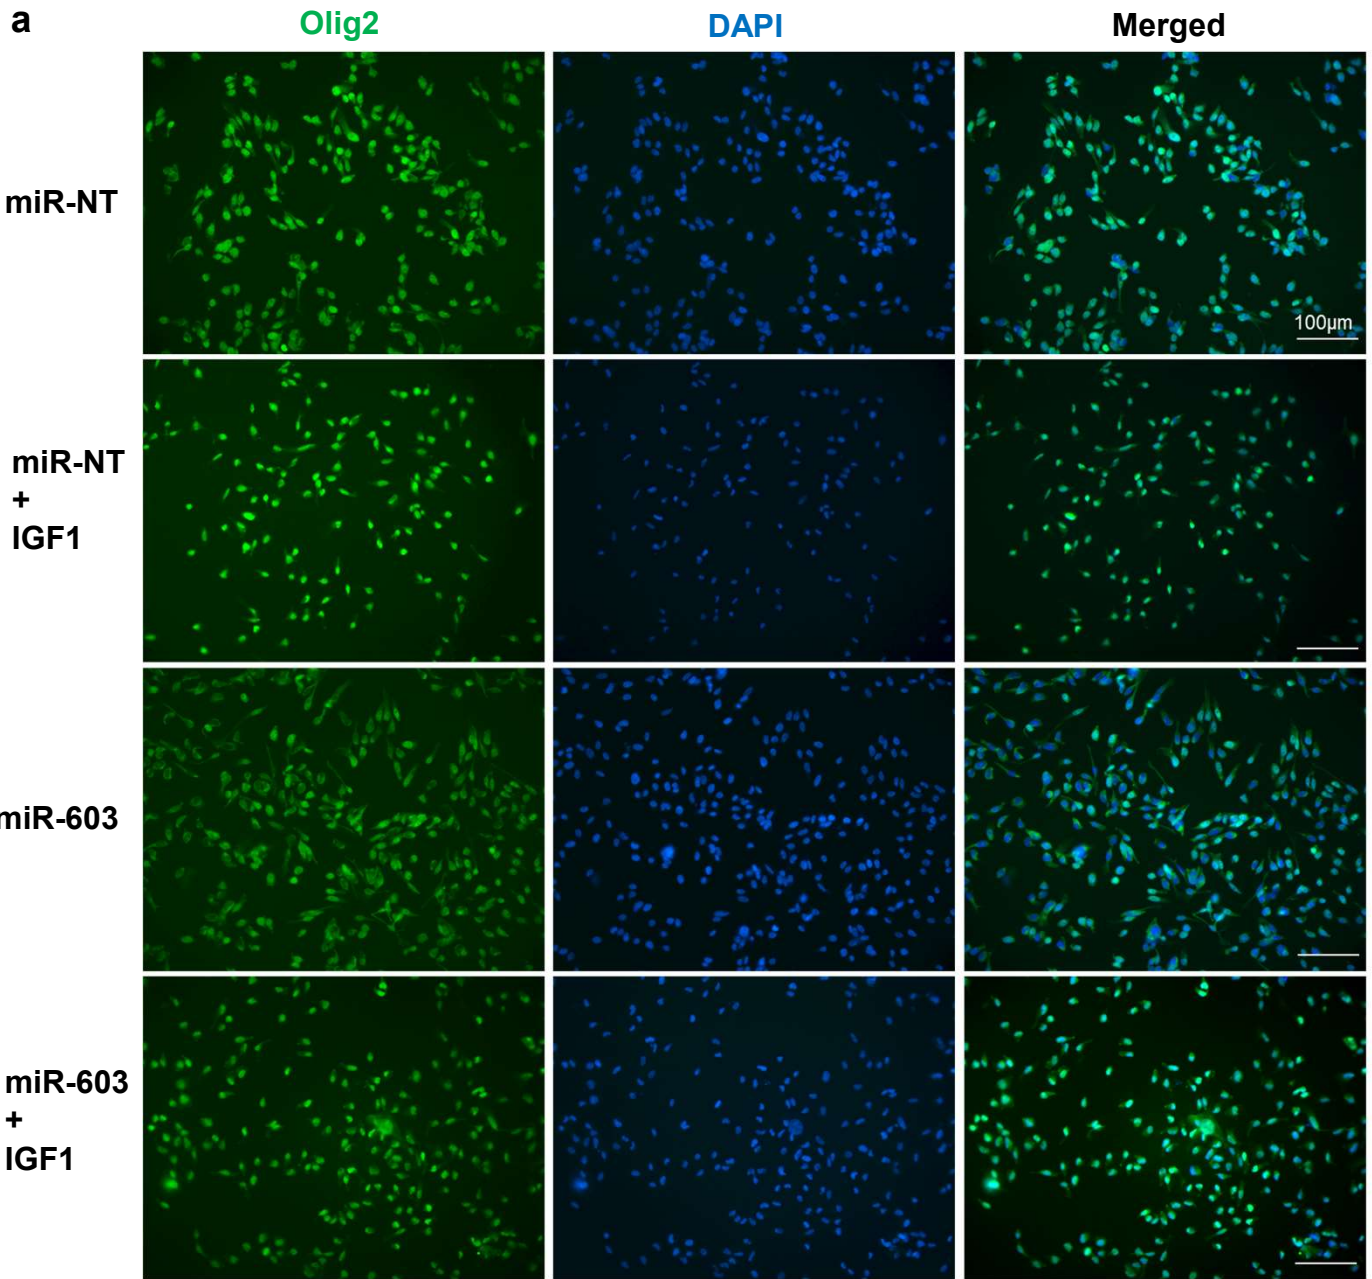

CMK3 cells

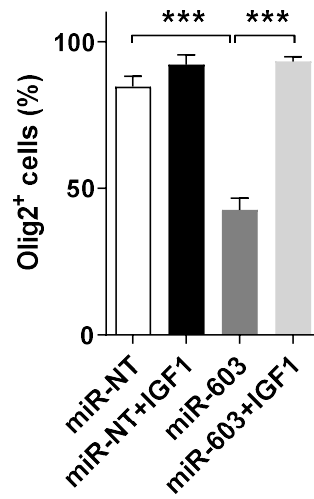

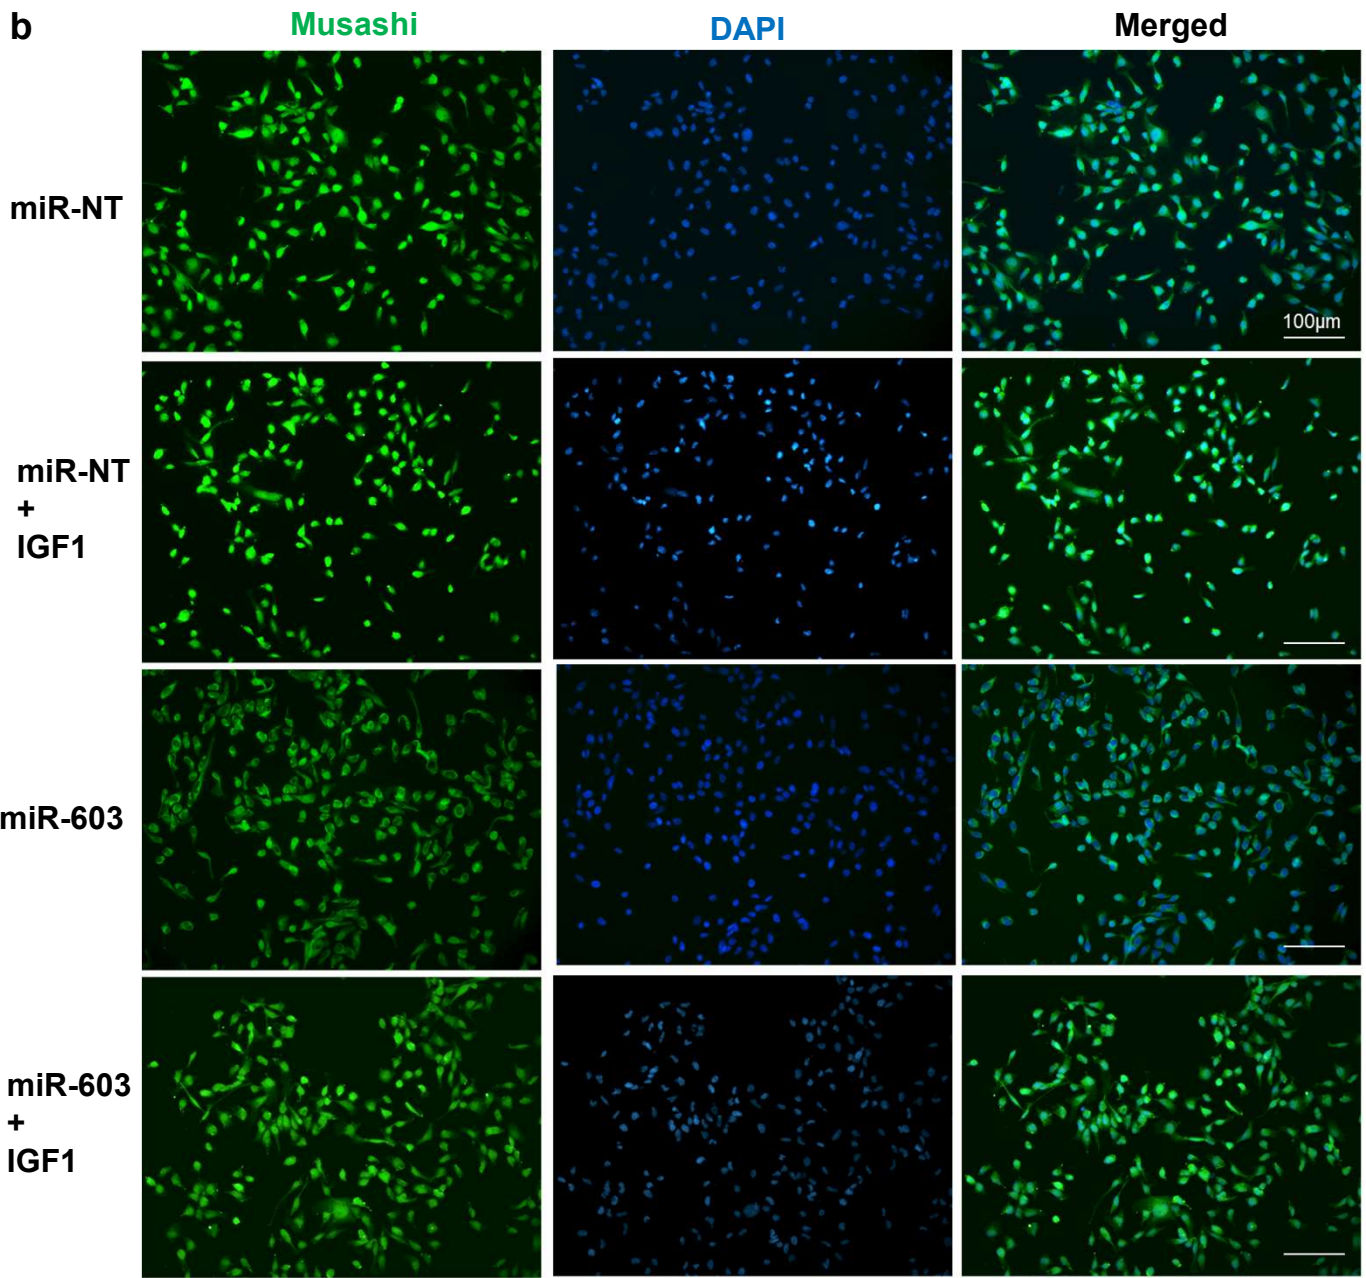

CMK3 cells

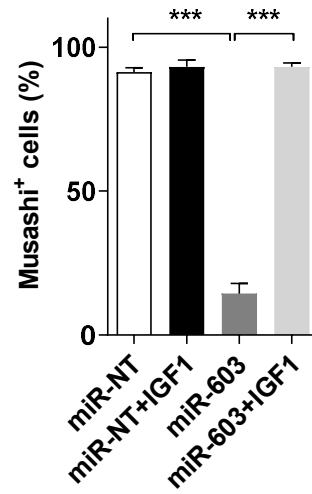

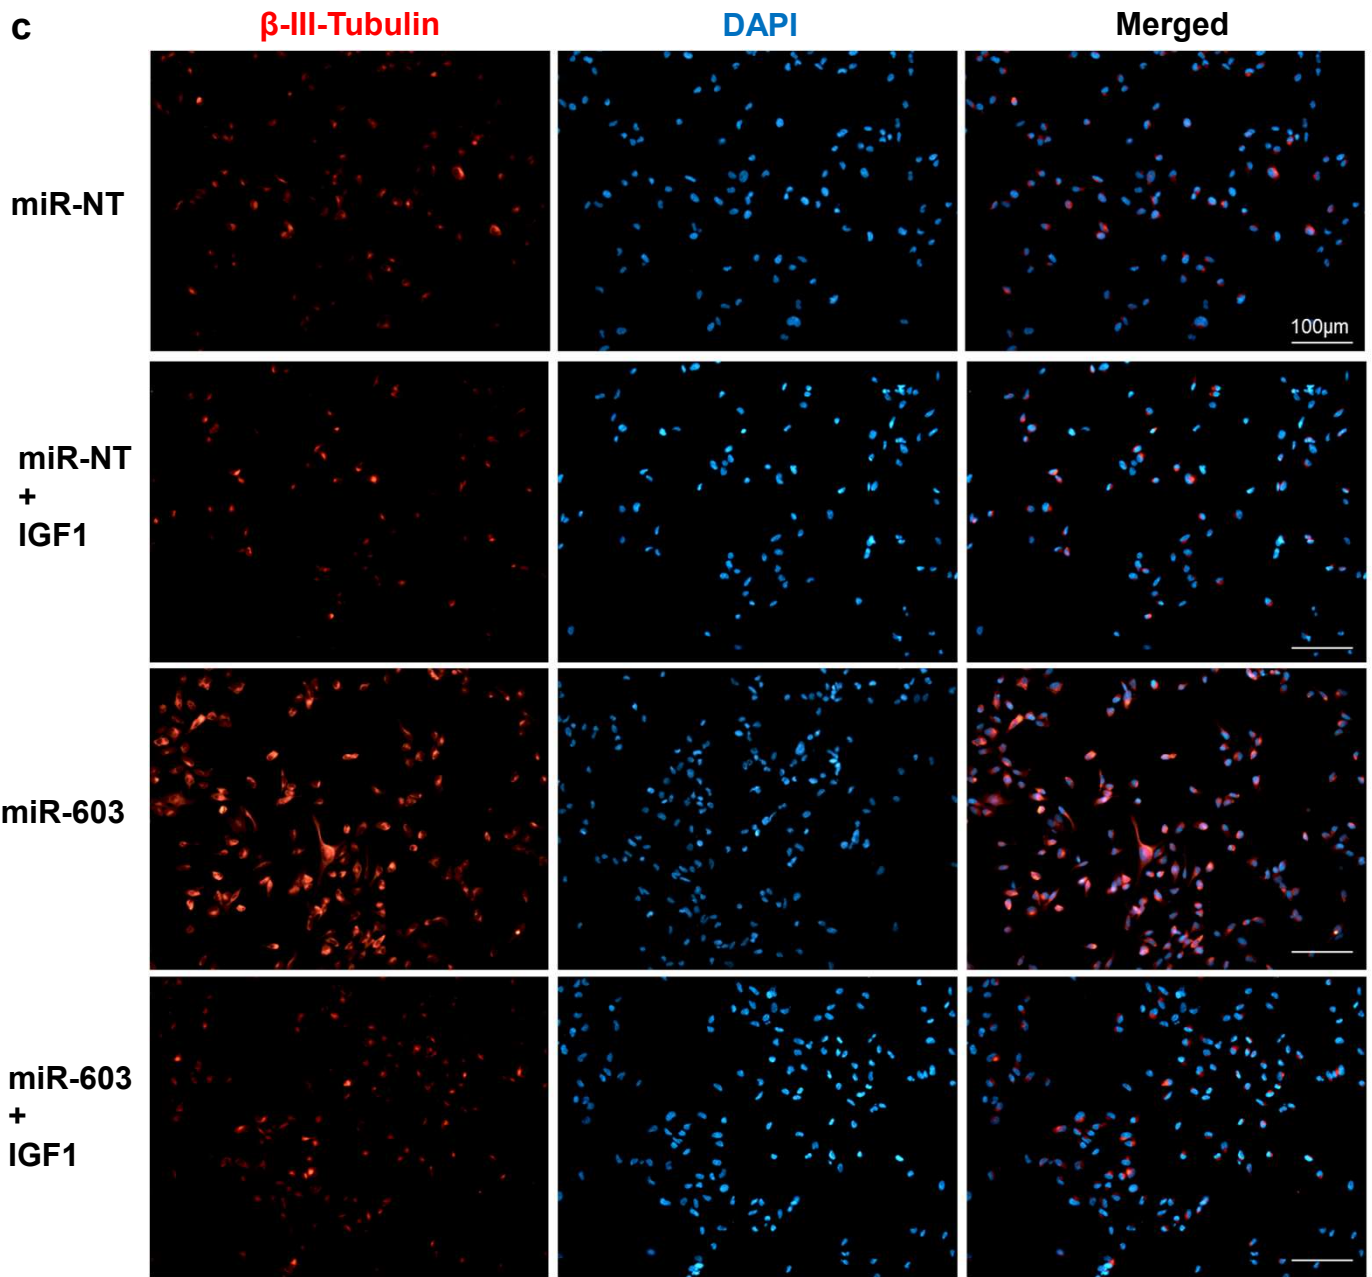

CMK3 cells

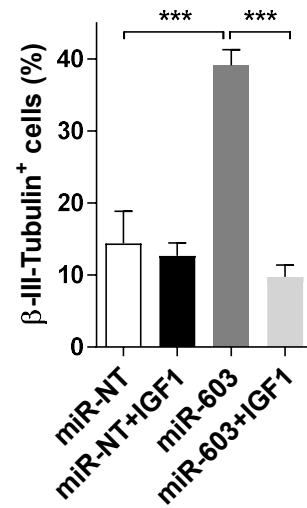

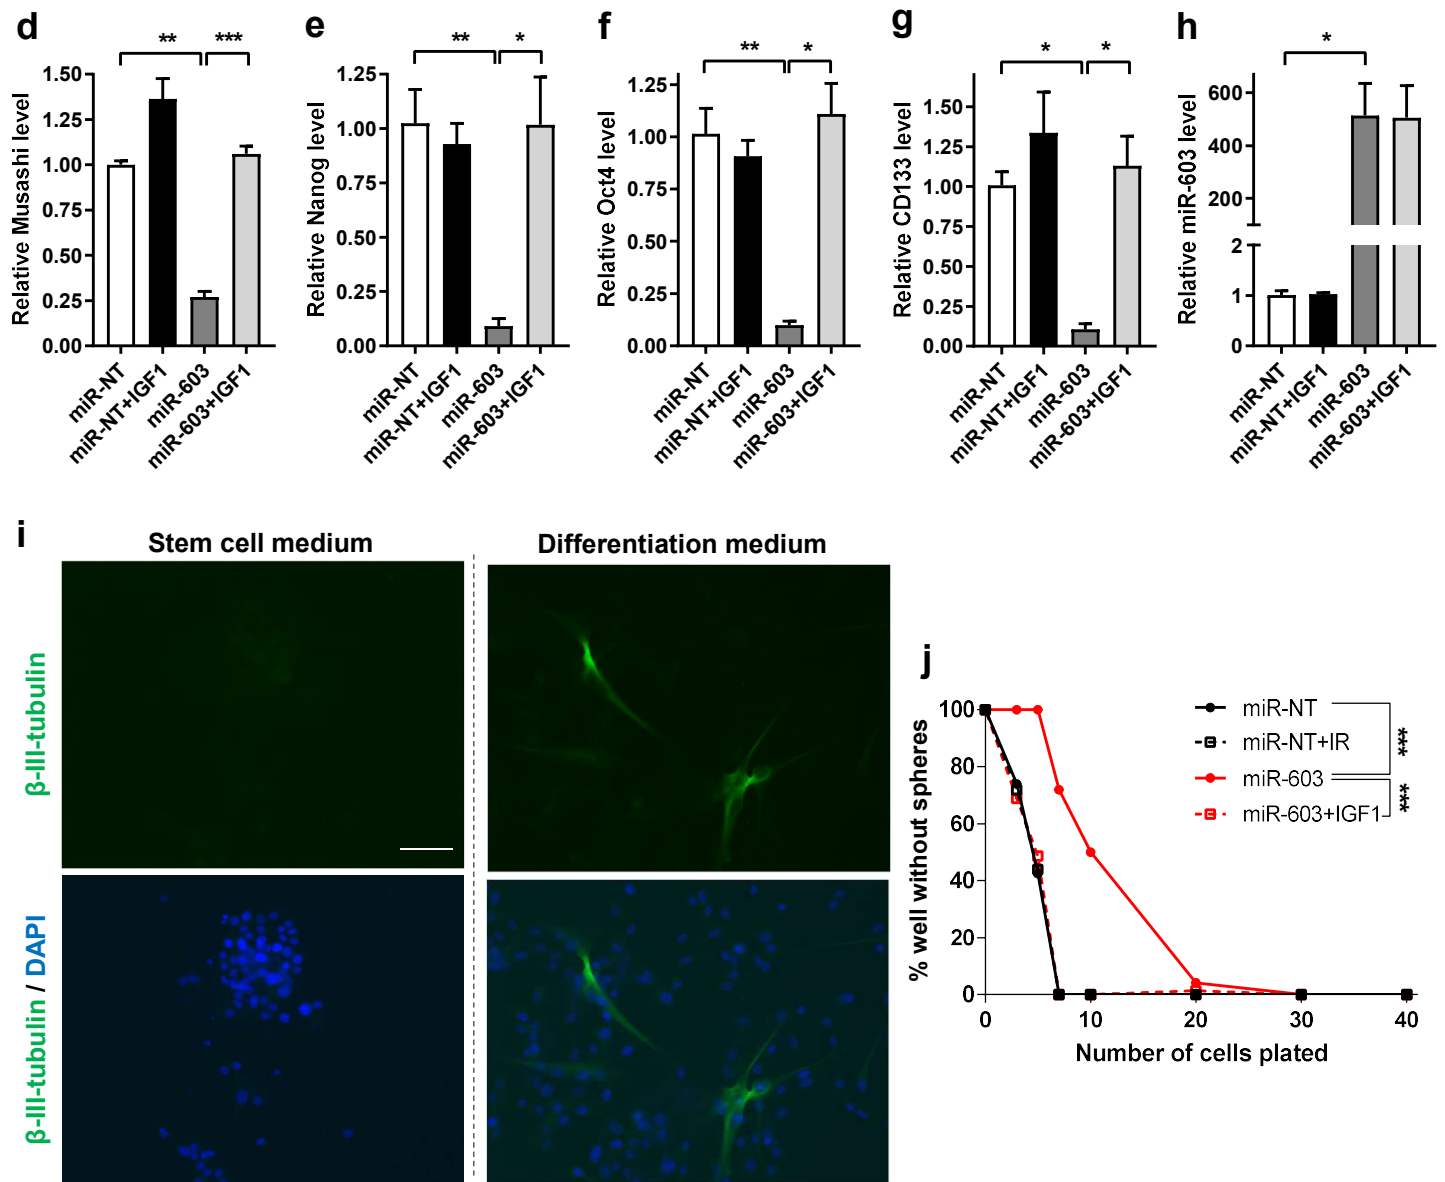

**Fig S3. Related to Figure 4. Detection of GBM stem-cell markers and differentiation marker in CMK3 cells transfected with miR-603 mimic.**

(a-c) CMK3 cells were transfected with non-targeting control miRNA or miR-603 mimic in the presence or absence of IGF1 treatment. The expression of Olig2 (a), Musashi (b), and β-III-Tubulin (c) was analyzed by immunofluorescence staining. Quantifications of staining positive cells are provided. \*\*\* $p < 0.001$  between indicated groups (one-way ANOVA). Scale bar is 100 μm.

(d-h) The mRNA levels of stem cell markers: Musashi (d), Nanog (e), Oct4 (f), CD133 (g) were suppressed by miR-603 transfection (h) in CMK3 cells, which was reversed by exogenous addition of IGF1. \* $p < 0.05$ , \*\* $p < 0.01$  and \*\*\* $p < 0.001$  between indicated groups (one-way ANOVA).

(i) Fluorescent staining of differentiation marker β-III-tubulin in BT-99 cells grown in stem cell medium or differentiation medium. Scale bar, 50 μm.

(j) *In vitro* limiting dilution assay in CMK3 cells transfected with miR-603 or miR-NT in the presence or absence of IGF1 treatment. \*\*\* $p < 0.001$  between indicated groups (Chi-square test).

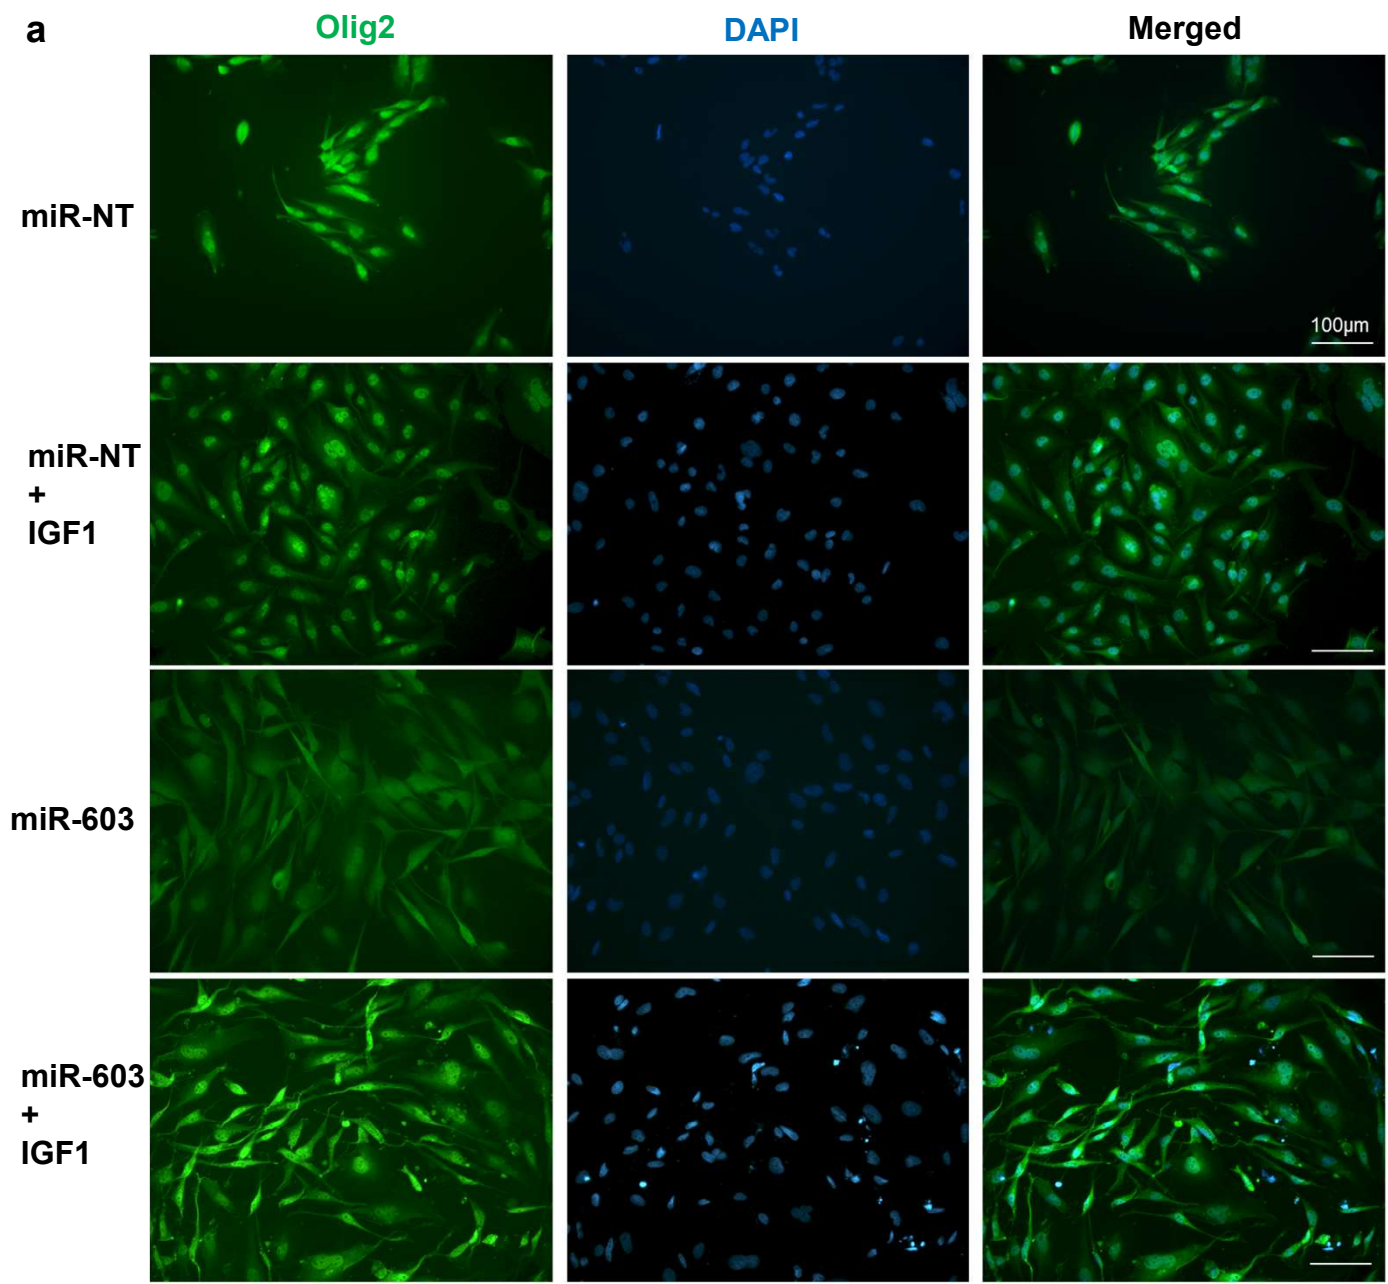

LN340 cells

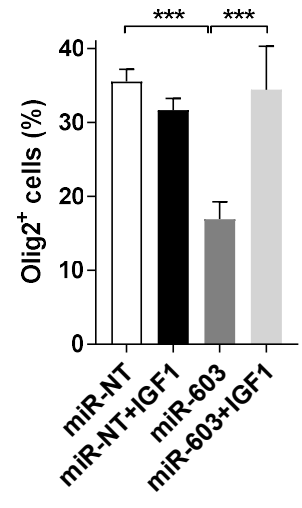

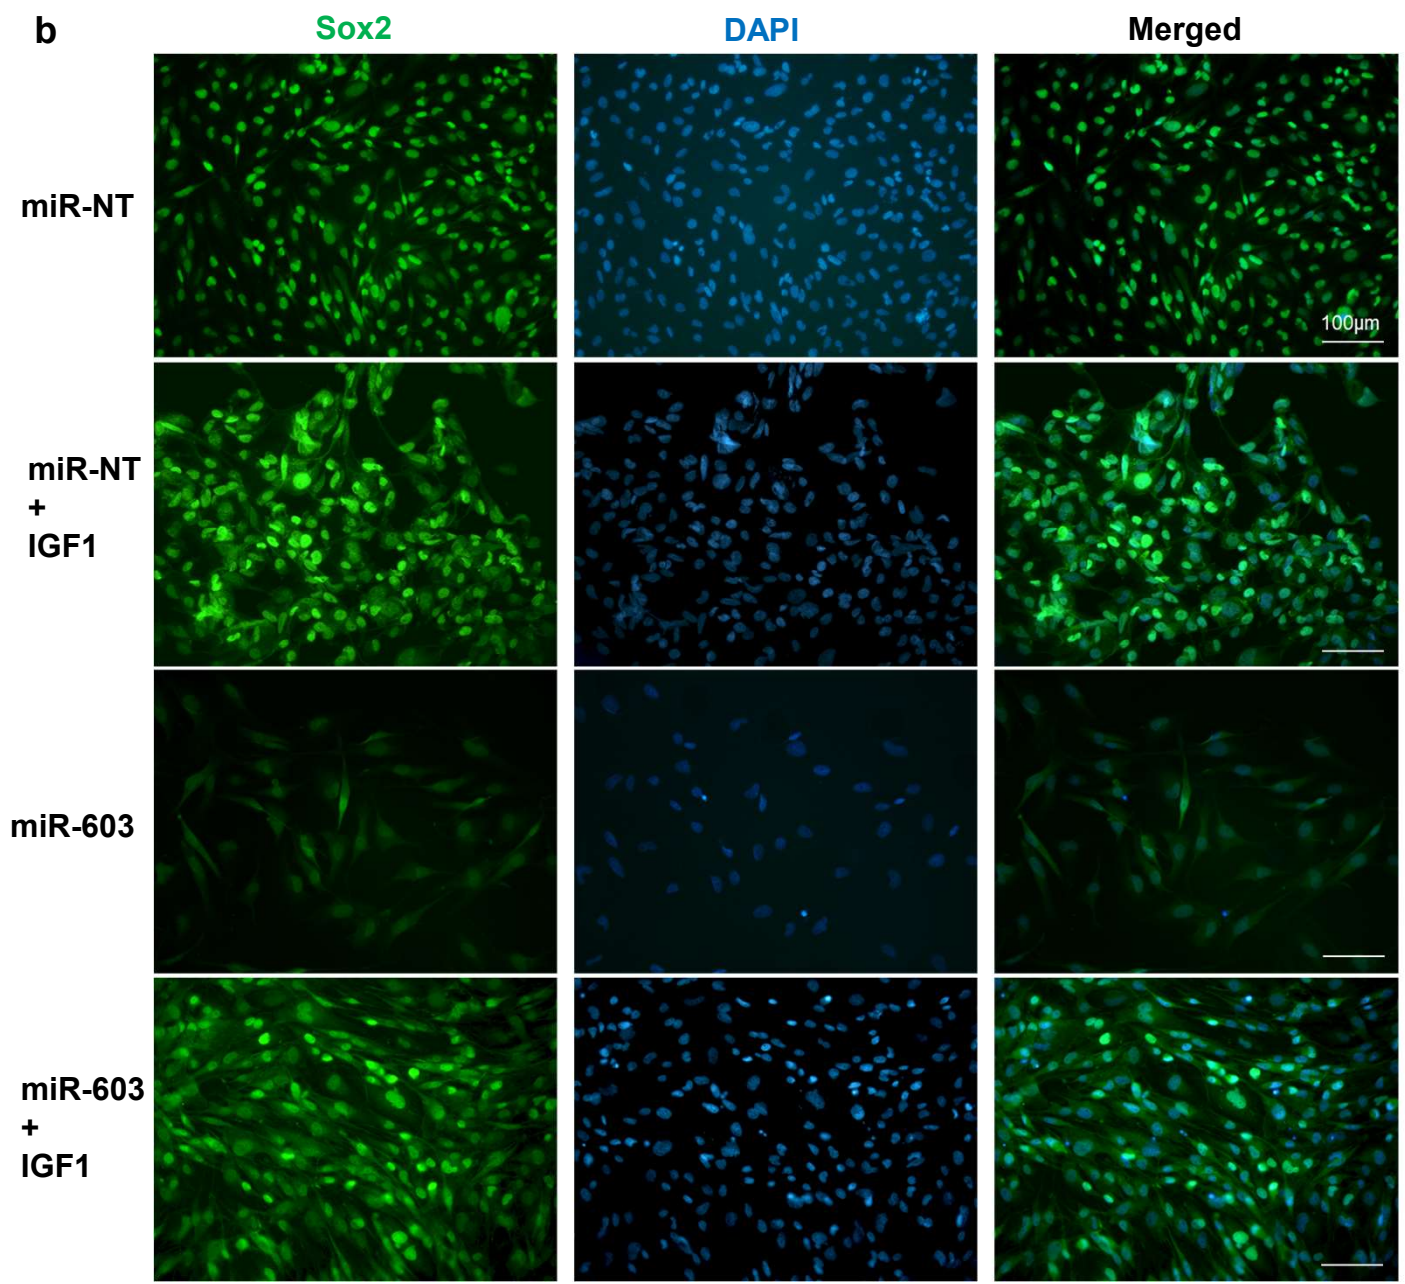

LN340 cells

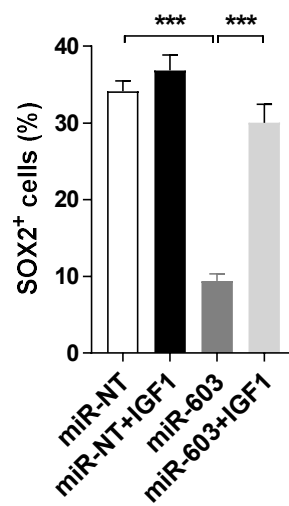



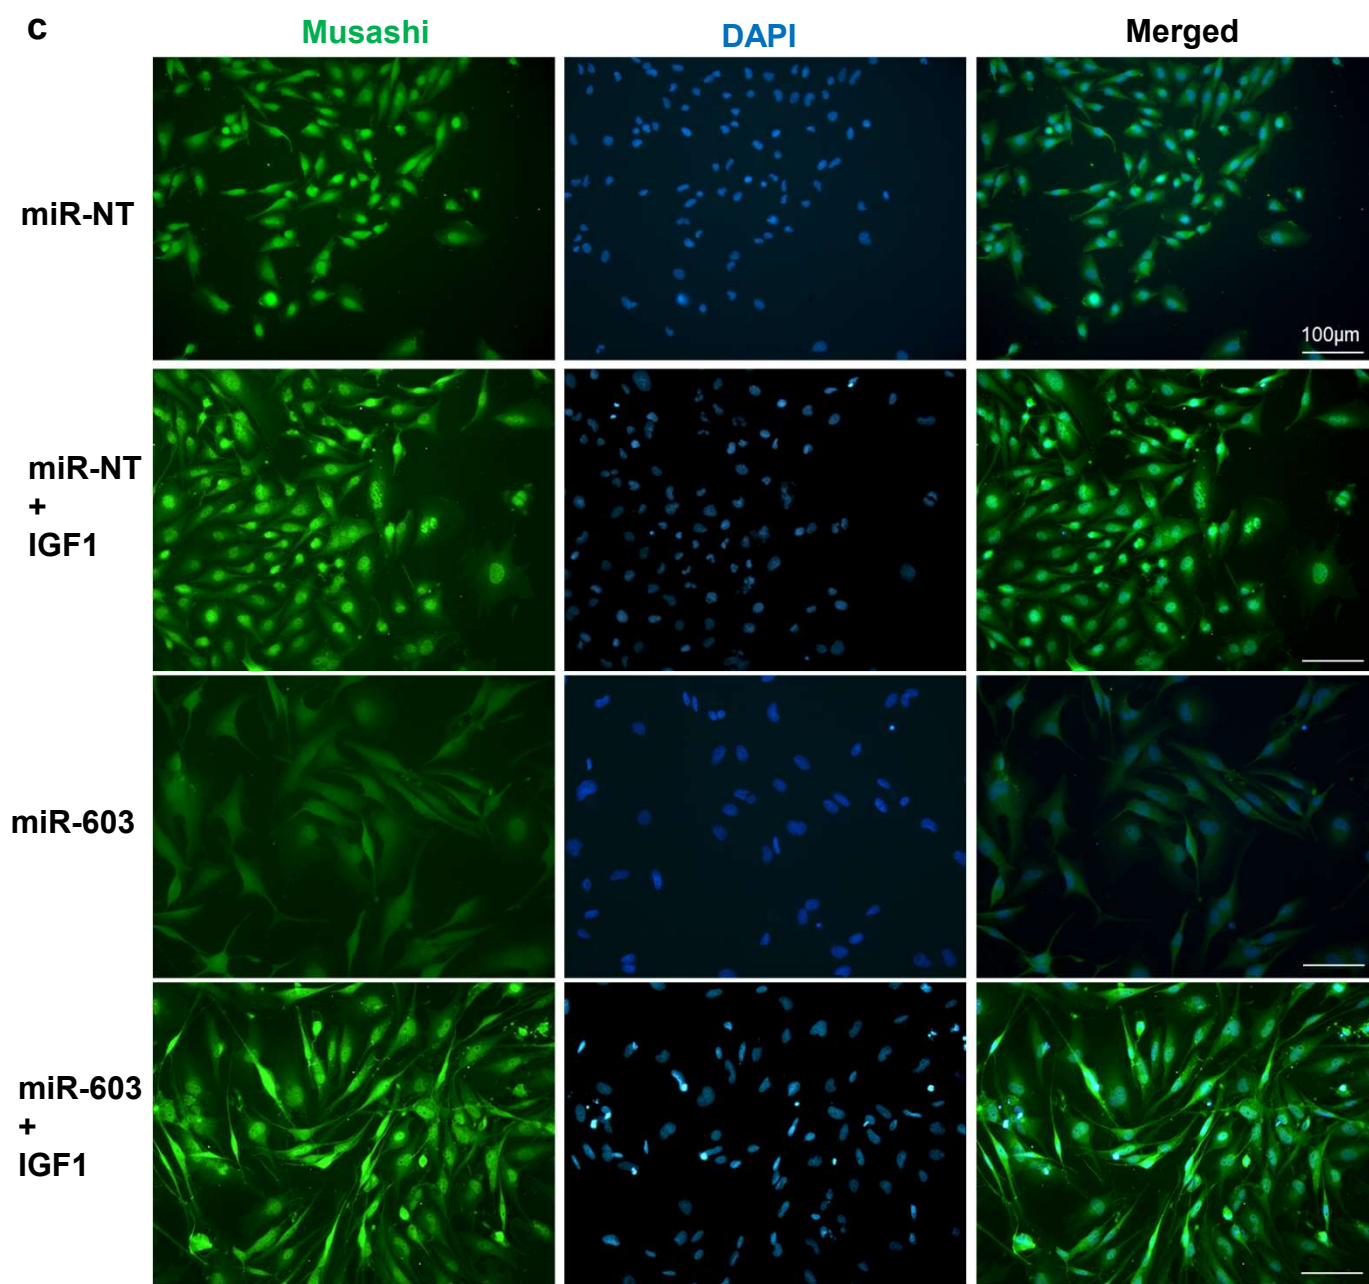

LN340 cells

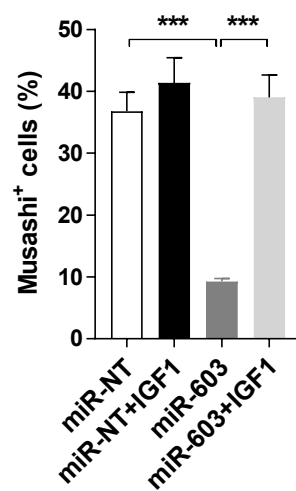

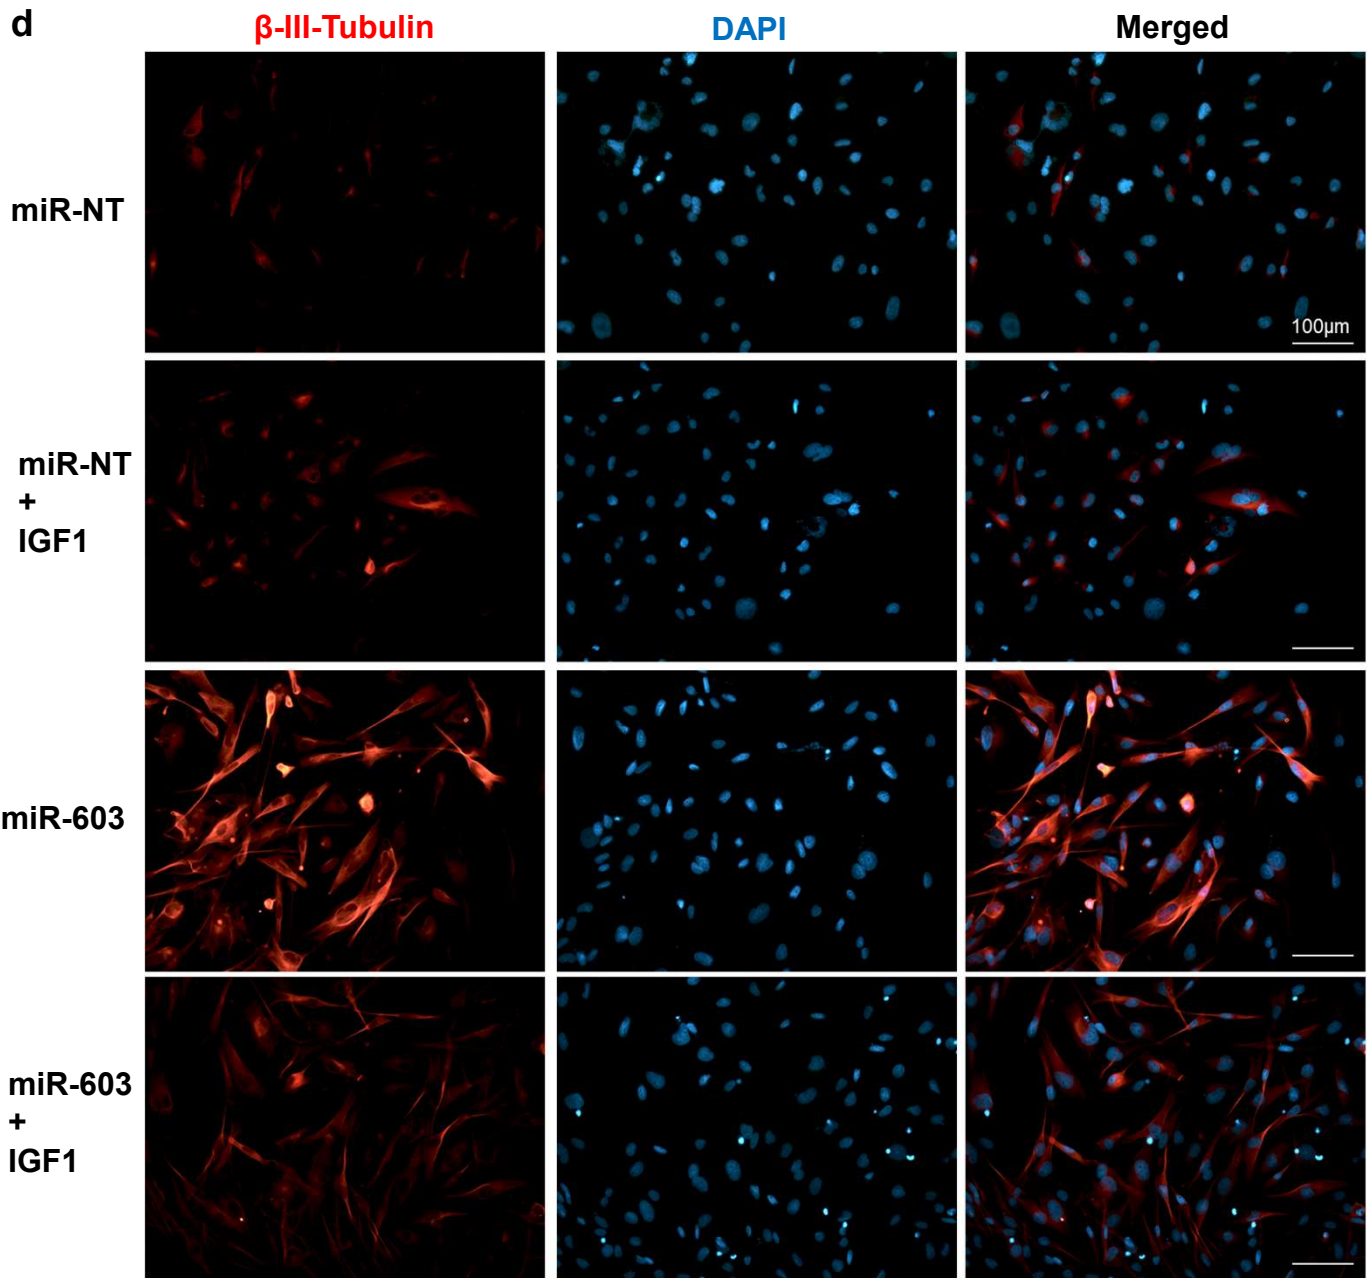

LN340 cells

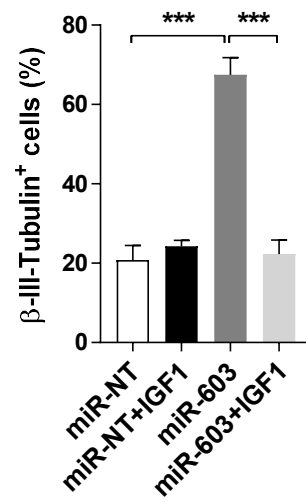

**Fig S4. Related to Figure 4. Detection of GBM stem-cell markers and differentiation markers in LN340 cells transfected with miR-603 mimic.**

LN340 cells were transfected with non-targeting control miRNA or miR-603 mimic in the presence or absence of IGF1 treatment. The expression of Olig2 (a), Sox2 (b), Musashi (c), and  $\beta$ -III-Tubulin (d) was analyzed by immunofluorescence staining. Quantifications of staining positive cells are provided. \*\*\*  $p < 0.001$  between indicated groups (one-way ANOVA). Scale bar is 100  $\mu$ m.

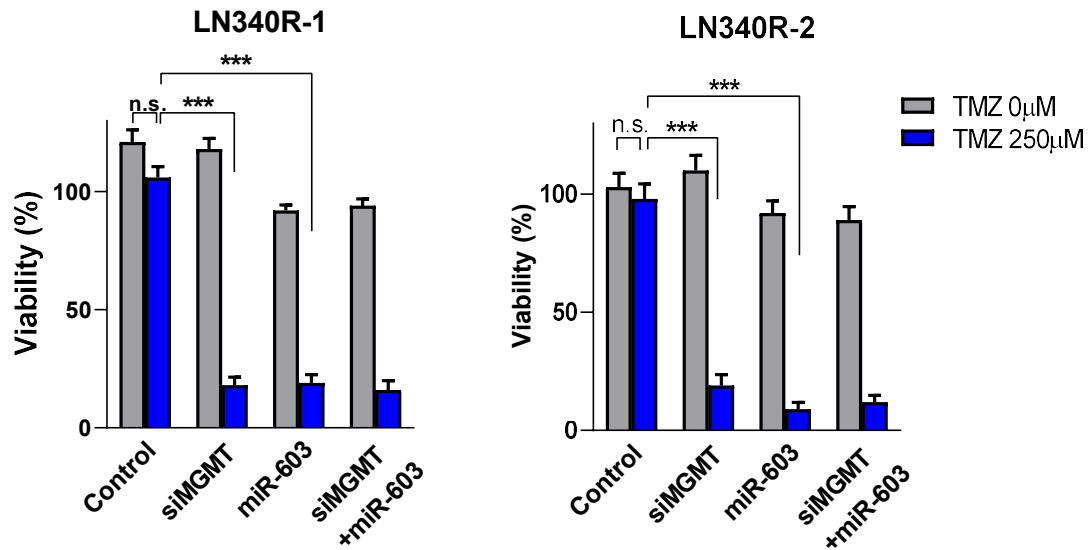

**Fig S5. Related to Figure 5. Ionizing radiation decreases miR-603 level to induce cross-resistance to TMZ.** IR caused cross-resistance to TMZ through upregulating MGMT. LN340R-1 and LN340R-2 cells were transfected with control, siMGMT, or miR-603 24 hours prior to TMZ (250 μM) treatment. Cell viability was measured 7 days after TMZ treatment and normalized to untreated LN340 without TMZ treatment. \*\*\* $p < 0.001$ ,  $n.s.p > 0.05$  between indicated groups (one-way ANOVA).

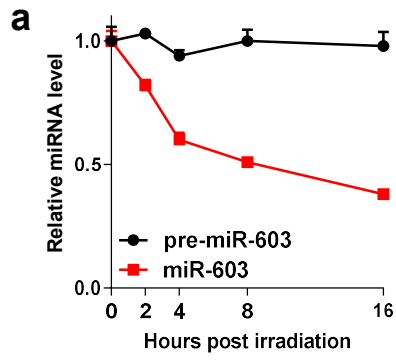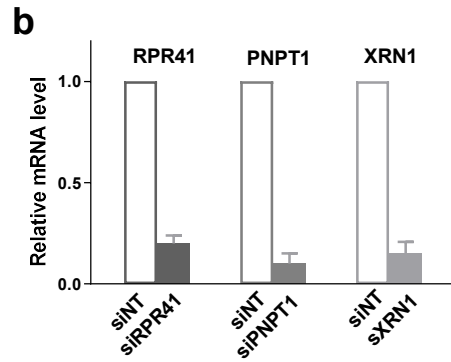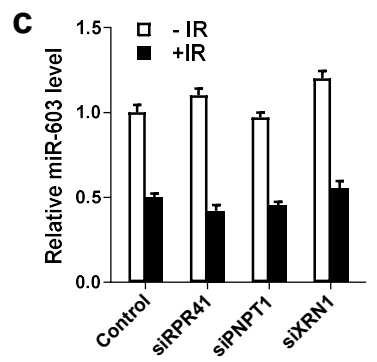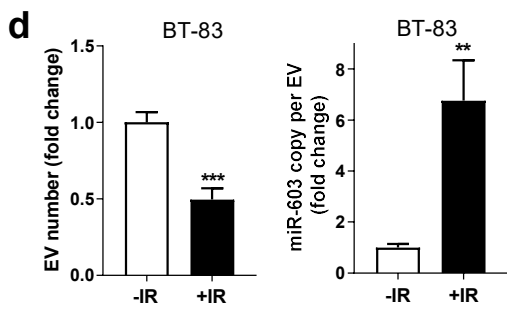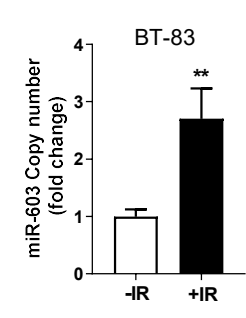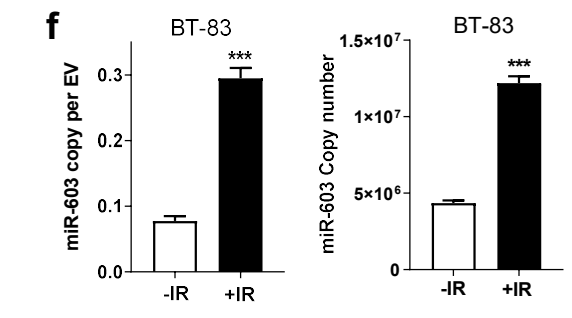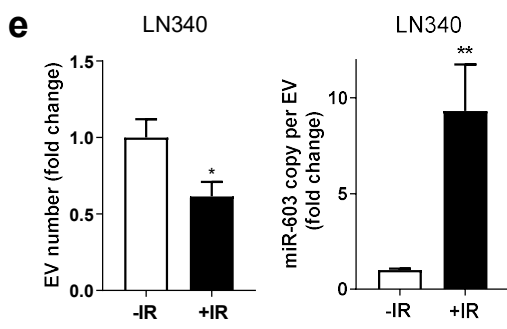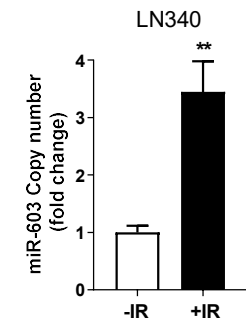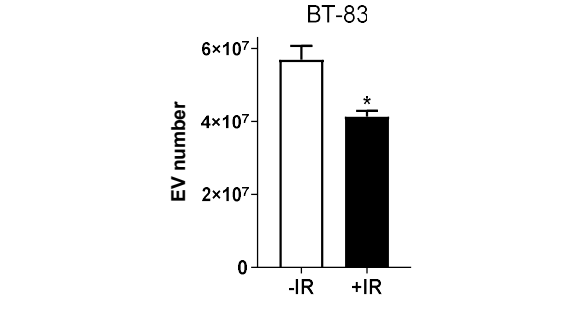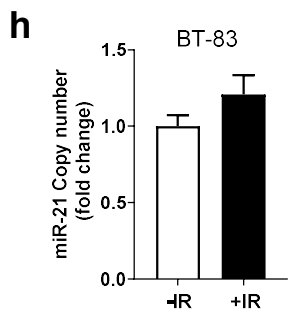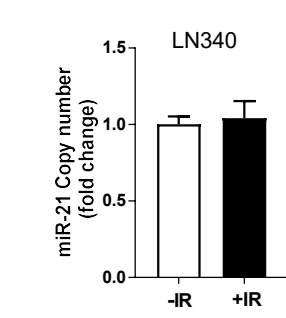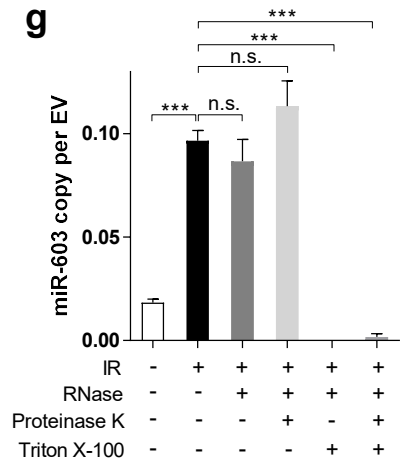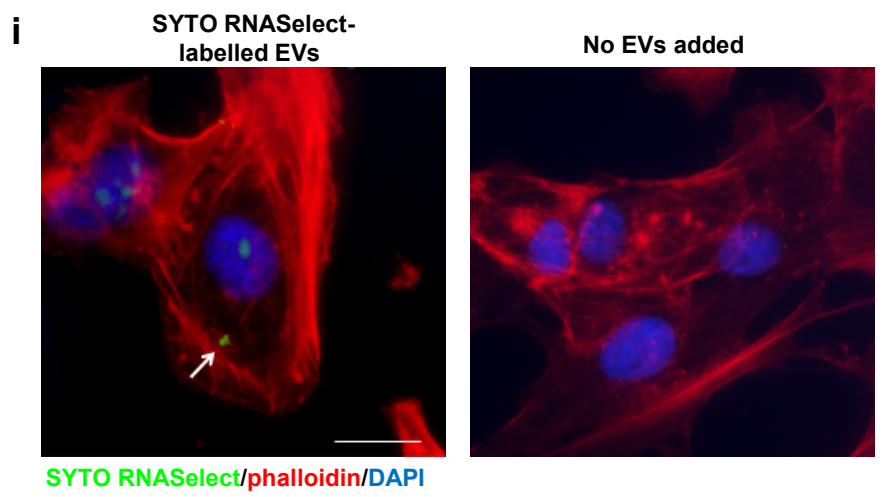

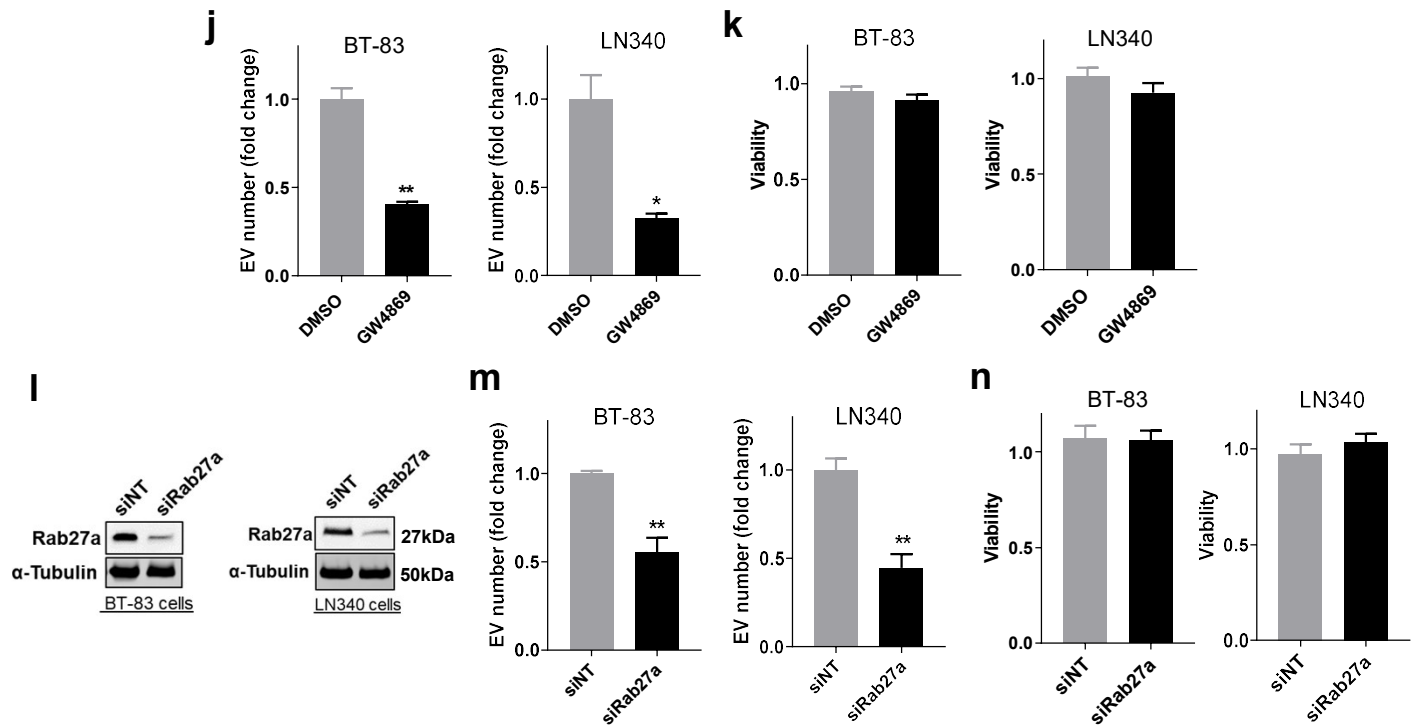

**Fig S6. Related to Figure 6. IR does not promote extracellular export of miR-21 via EVs.**

(a) Ionizing radiation decreased cellular level of miR-603, but not pre-miR-603 in LN340 cells. qPCR was performed to measure the expression of miR-603 or pre-miR-603 at indicated time points in LN340 cells treated with or without 6 Gy IR.

(b) qPCR analysis of RPR41/PNPT1/XRN1 mRNA expression following siRNA-mediated silencing in LN340 cells.

(c) Silencing of microRNAses (RPR41, PNPT1, XRN1) did not significantly impact the effect of IR on miR-603 level in LN340 cells.

(d and e) EVs secreted by irradiated-or unirradiated BT-83 cells (d) or LN340 cells (e) were isolated using Total Exosome Isolation Reagent. RNA was extracted from isolated EVs and subject to absolute quantification of miR-603. The differences of EV number, miR-603 copy number and miR-603 copy number per EV between those two groups was expressed as fold changes.  $**p < 0.01$  indicate statistically significant difference versus unirradiated control group (Student's *t* test).

(f) EVs secreted by irradiated-or unirradiated BT-83 cells were isolated using Qiagen exoEasy Maxi kit and quantified by NTA. RNA was extracted from isolated EVs and subject to absolute quantification of miR-603. The values of miR-603 copy number, EV number and miR-603 copy number per EV in an representative experiment were shown.  $*p < 0.05$ ,  $***p < 0.001$  versus unirradiated control group (Student's *t* test).

(g) EVs secreted by irradiated- or unirradiated LN340 cells were isolated using differential ultracentrifugation (dUC) and incubated with the indicated treatments before isolating RNA and measuring the levels of miR-603. The EV pellets were incubated with RNase A (0.5  $\mu\text{g}/\mu\text{l}$ ) alone or were incubated with proteinase K (0.4  $\mu\text{g}/\mu\text{l}$ ) prior to RNase treatment in the presence or absence of 2% Triton X-100.  $***p < 0.001$ ,  $n.s.p > 0.05$  between indicated groups (one-way ANOVA).

(h) miR-21 secreted through EVs was not changed after IR treatment in both BT-83 and LN340 cells.

(i) Representative fluorescence microscopy images for SYTO RNaselect-labelled EVs uptake by human microglia HMC3 cells after 6 hours incubation. Green: SYTO RNaselect stain; red: Alexa Fluor 594 phalloidin; blue: DAPI. Scale bar: 10  $\mu\text{m}$ .

(j) Fold change of EV secretion in BT-83 and LN340 cells with or without GW4869 treatment.  $*p < 0.05$ ,  $**p < 0.01$  versus DMSO control group (Student's *t* test).

(k) Cell viability fold changes of DMSO-treated and GW4869-treated BT-83 or LN340 cells.

(l) Protein expression of Rab27a was measured in negative control siRNA(siNT)- or siRab27a-transfected BT-83 or LN340 cells by western blot assay.  $\alpha$ -Tubulin was used as the loading control.

(m) Fold change of EV secretion in BT-83 and LN340 cells transfected with siNT or siRab27a.  $**p < 0.01$  versus siNT-transfected group (Student's *t* test).

(n) Cell viability fold changes of siNT and siRab27a-transfected BT-83 or LN340 cells.

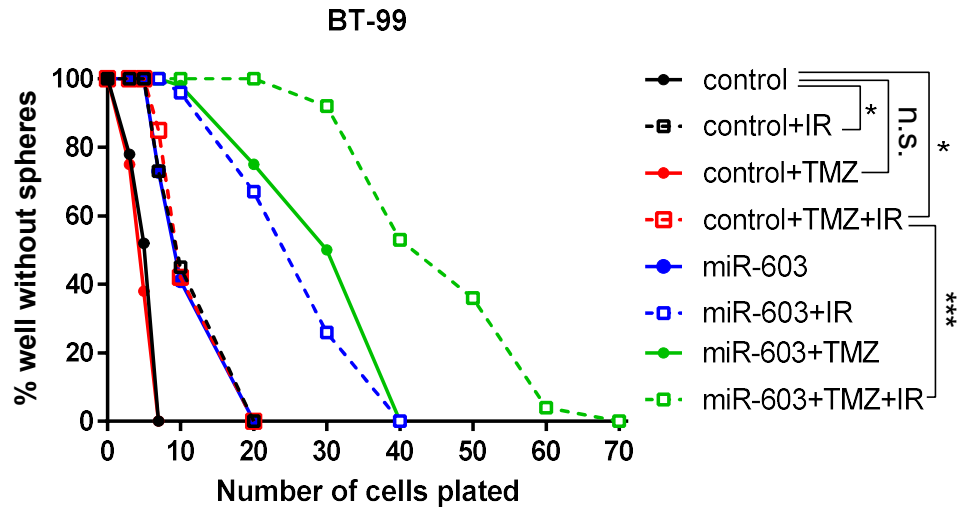

**Fig S7. Related to Figure 7. miR-603 synergized with IR (6 Gy) and TMZ treatment (100  $\mu$ M) in BT-99 *in vitro*.**

Limiting dilution assay was performed using BT-99, an MGMT promoter unmethylated glioblastoma with high MGMT expression, with or without stable miR-603 expression. \* $p < 0.05$ ; \*\*\* $p < 0.001$ ; n.s. $p > 0.05$  between indicated groups (Chi-square test)
