# Supplementary material for: Radiation-induced extracellular vesicle (EV) release of miR-603 promotes IGF1-mediated stem cell state in glioblastomas
Source: PubMed Central journal article supplement — eBioMedicine. 2020 Apr 28;55:102736. doi: 10.1016/j.ebiom.2020.102736 (PMC7195524; doi:10.1016/j.ebiom.2020.102736), 2020-04-28
Supplement: mmc2.pdf [file mmc2.pdf]

**Table S1. Cross-reference list of miR-603 targeting genes in LN340 and T98G cells, Related to Figure 2.**

| Gene symbol |          |          |          |          |         |          |          |
|-------------|----------|----------|----------|----------|---------|----------|----------|
| AAK1        | ALDOA    | BIRC5    | CLUAP1   | DSEL     | G2E3    | HIGD2A   | IQCH     |
| AAMP        | ALDOC    | C10orf84 | CLYBL    | DSG2     | GFOD2   | HINT1    | IQCK     |
| AARSD1      | ALG10B   | C11orf54 | CMAH     | DST      | GFPT1   | HIP1     | IQGAP2   |
| AASS        | ANKRD13C | C19orf42 | CMBL     | DSTN     | GFRA1   | HIPK1    | IQGAP3   |
| ABAT        | ANKRD16  | C19orf62 | CMPK1    | EFNA5    | GGA1    | HIST1H4J | IQSEC1   |
| ABCA1       | ANO10    | CCDC89   | CMTM4    | EFNB2    | GGA2    | HOPX     | IRAK1    |
| ABI2        | ANO6     | CCNF     | CMTM6    | EFR3A    | GGCX    | HOXA13   | IREB2    |
| ABLIM1      | ANP32A   | CCNG1    | CNIH4    | EFR3B    | GLCC1I  | HOXA2    | IRF2BP2  |
| ACAA1       | ANP32E   | CCNG2    | CNKSR2   | EFTUD2   | GLDN    | HOXA3    | IRGQ     |
| ACAA2       | APC      | CCNH     | COL14A1  | EGF      | GLG1    | HOXA5    | IRS1     |
| ACACA       | APEH     | CCNI     | COL15A1  | EGFR     | GLI3    | HOXB13   | IRS2     |
| ACADSB      | APH1B    | CCNJL    | COPB2    | EGLN1    | GLIPR1  | HOXC10   | IRX1     |
| ACADVL      | API5     | CCNY     | COQ7     | EGLN3    | GLIS1   | HP1BP3   | IRX3     |
| ACAN        | APIP     | CCPG1    | CORO1B   | EI24     | GNAO1   | HPS5     | IRX5     |
| ACAP2       | APITD1   | CCS      | COTL1    | EIF1     | GNAQ    | HR       | ITGB5    |
| ACAT1       | APLP1    | CD46     | COX11    | EIF1AY   | GNAS    | HRCT1    | ITGBL1   |
| ACAT2       | ASRGL1   | CD59     | COX15    | EIF4G3   | GNB1    | HTR2C    | ITM2C    |
| ACCN2       | ASTN2    | CD99L2   | COX16    | EIF4H    | GNB4    | HTR7     | ITPK1    |
| ACE         | ASXL1    | CDC14B   | COX17    | EIF5     | GNB5    | ID4      | ITSN1    |
| ACER3       | ASXL2    | CDC20    | COX18    | EPHA3    | GNE     | IDE      | IVD      |
| ACP6        | ATAD2    | CDC23    | COX4NB   | EPHA5    | GNG10   | IDH1     | JAG1     |
| ACSL1       | ATE1     | CDC25B   | COX7A2L  | EPHB3    | GNG12   | IDH3A    | JAK1     |
| ACSL3       | ATF6     | CDC25C   | COX7B    | EPHX1    | GNG2    | IDH3B    | JAKMIP2  |
| ACSL6       | ATF6B    | CDC40    | CP       | EPR1     | GNG4    | ID1I     | JAKMIP3  |
| ACSS2       | ATP2A2   | CDC42    | CTH      | ESYT2    | GNL1    | IDS      | JAM3     |
| ACTR1A      | ATP2A3   | CDC42BPA | CTNNA1   | ETF1     | GNL3L   | IERSL    | JAZF1    |
| ACTR1B      | ATRN     | CDC42BPB | CTNNA2   | ETFA     | GNL3LP1 | IFNAR1   | JMJD6    |
| ACTR2       | ATRX     | CDC6     | CTNNAL1  | ETFDH    | GNPAT   | IFT81    | JMJD7    |
| ADRBK2      | ATXN1    | CDCA2    | CTNNB1   | ETNK1    | GNPTAB  | IFT88    | JRK      |
| AFAP1       | BACH2    | CDCA3    | CTNNBIP1 | ETNK2    | GNS     | IGDCC4   | KCNQ1OT1 |
| AFF1        | BAG5     | CDCA4    | CTNND1   | ETV3     | GOLGA2  | IGF1R    | KCTD10   |
| AFF3        | BAGE2    | CDH11    | CTSB     | ETV6     | GPN3    | IGFBP3   | KCTD12   |
| AFMID       | BAI3     | CDH13    | CUL4B    | EVI5     | GPNMB   | IGFBP5   | KCTD20   |
| AIG1        | BAT2L1   | CDH3     | CUL5     | FADS3    | GPR107  | IGHG1    | KCTD7    |
| AIMP1       | BAT2L2   | CDH6     | DARS2    | FAF2     | HEATR3  | IGSF3    | KDEL2    |
| AIMP2       | BAT3     | CDK1     | DAZAP2   | FAH      | HEATR5A | IK       | KDELR1   |
| AK1         | BBS1     | CDK12    | DBF4     | FBN2     | HEBP2   | IKBIP    | KDELR2   |
| AK3         | BBS4     | CDK13    | DBI      | FBXW9    | HECTD1  | IKBKAP   | KDELR3   |
| AK4         | BBS9     | CDK14    | DBP      | FCF1     | HECTD2  | IL11RA   | KDMA1A   |
| AK5         | BBX      | CDKN3    | DBT      | FCHSD2   | HECTD3  | IL13RA1  | KDM5A    |
| AKAP12      | BCAP29   | CDON     | DDR1     | FDFT1    | HEG1    | IL17RD   | KDM5B    |
| AKAP9       | BCAS3    | CEP97    | DDR2     | FDPS     | HELLS   | IL1F7    | KDM5C    |
| AKR1A1      | BCAT1    | CERK     | DDT      | FDXACB1  | HELZ    | IL1RAP   | KIF23    |
| AKR1B10     | BCAT2    | CETN2    | DDX42    | FDXR     | HERC1   | IL2RB    | KIF9     |
| AKR1C3      | BCCIP    | CFL1     | DDX46    | FECH     | HERC2   | IL6R     | KIFC1    |
| AKR7A2      | BCL10    | CFL2     | DDX5     | FEM1B    | HERC2P3 | IL6ST    | KIRREL   |
| AKT1S1      | BCL2     | CHCHD5   | DDX6     | FER      | HES1    | ILF2     | KLF12    |
| AKT2        | BCL2L11  | CHCHD6   | DLD      | FER1L4   | HES6    | ILF3     | KLF13    |
| AKT3        | BCL2L12  | CHD3     | DLEU1    | FGD6     | HEY1    | ILVBL    | KLF9     |
| AKTIP       | BCL2L13  | CITED1   | DLEU2    | FGF12    | HEY2    | IPO4     | KLHL36   |
| ALDH18A1    | BCL2L2   | CIZ1     | DLG1     | FGFR1OP  | HFE     | IPO5     | KLHL4    |
| ALDH1B1     | BCL6B    | CKAP2    | DONSON   | FGFR1OP2 | HGSNAT  | IPO8     | KPNA1    |
| ALDH2       | BCL7C    | CKAP2L   | DOT1L    | FGFRL1   | HHAT    | IPO9     | KPNA2    |
| ALDH3A2     | BCL9     | CLASP1   | DPCD     | FKTN     | HHIP    | IPP      | KPNA4    |
| ALDH4A1     | BCLAF1   | CLASP2   | DPH3     | FZD5     | HHIPL2  | IPW      | KPNA6    |
| ALDH5A1     | BCR      | CLTC     | DPM3     | FZD6     | HIBCH   | IQCD     | KPNB1    |
| ALDH9A1     | BICD2    | CLU      | DPP3     | FZD7     | HIF1AN  | IQCE     | KRAS     |

| Gene symbol    |            |          |           |          |                    |           |
|----------------|------------|----------|-----------|----------|--------------------|-----------|
| KTN1           | MAP3K7     | NEIL2    | PHKA1     | PTEN     | SLC2A10            | TET1      |
| L1CAM          | MAP3K9     | NEK1     | PHKA2     | PTGFRN   | SLC2A12            | TET2      |
| L3MBTL1        | MAP4       | NF1      | PHKB      | PTGR1    | SLC2A14 /// SLC2A3 | TET3      |
| LAGE3          | MAP4K2     | NF2      | PIAS2     | PTGR2    | SLC2A3             | TEX10     |
| LAPTM4B        | MAP6       | NFATC1   | PIGX      | PTGS1    | SLC2A4RG           | TEX2      |
| LIFR           | MAP6D1     | NFATC2   | PIH1D1    | PTK7     | SLC30A4            | TEX261    |
| LIMS1          | MAP7D3     | NFATC2IP | PIK3C2A   | PTMS     | SLC30A5            | TGOLN2    |
| LIN52          | MAP9       | NFATC3   | PIK3C3    | PTP4A1   | SLC30A6            | TNFRSF11B |
| LMBRD2         | MAPK1      | NFIA     | PIK3CA    | PTPN11   | SLC30A7            | TNFRSF19  |
| LMCD1          | MAPK11     | NFIB     | PIK3CB    | PTPN13   | SLC31A1            | TNFRSF21  |
| LMLN           | MAPK14     | NFIC     | PIK3R1    | PTPN14   | SLC43A2            | TNRC6B    |
| LMO4           | MAPK1IP1L  | NFIX     | PIK3R2    | PTPN18   | SLC44A2            | TNRC6C    |
| LMTK2          | MAPK6      | NHLRC2   | PIK3R3    | PTPN2    | SLC45A1            | TNS3      |
| LNP1           | MAPK8      | NHS      | PIKFYVE   | PTPN23   | SLC45A4            | TP53      |
| LNPEP          | MAPK9      | NIPA2    | PIM2      | PTPN3    | SLC46A3            | TP53BP1   |
| LOC100128191   | MAPKAP1    | NIPBL    | PIN1      | PTPRS    | SLC47A1            | TP53INP1  |
| LOC100292680   | MAPRE1     | NKX2-1   | PIP4K2B   | PTPRZ1   | SLC4A3             | TP53INP2  |
| LOC100303728   | MAPT       | NLGN1    | PIR       | PTS      | SLC4A7             | TPCN1     |
| LOC100499466   | MARCKS     | NMNAT2   | PITPNM3   | PTTG1IP  | SLC4A8             | TPCN2     |
| LOC100505497   | MATR3      | NMT1     | PITRM1    | PTTG3P   | SLC7A1             | USP16     |
| LOC100505560   | MAVS       | NMT2     | PJA2      | PURB     | SLC7A11            | USP2      |
| LOC100505876   | MBD4       | NNMT     | POLH      | QKI      | SLC7A5             | USP48     |
| LOC100505935   | MBNL2      | NOTCH2   | POLR2J4   | QSER1    | SLC9A6             | USP6NL    |
| LOC100505937   | MCC        | NUP88    | POLR3B    | RAB26    | SLC9A7             | USP7      |
| LOC100506090   | METTL10    | NUP98    | POM121L9P | RAB27A   | SNX30              | USP8      |
| LOC100506100   | MFSD1      | NUPL1    | POMGNT1   | RAB4A    | SNX5               | USP9X     |
| LOC100507773   | MFSD11     | NUS1     | POMT1     | RAB4B    | SOX11              | USP9Y     |
| LOC100508121   | MGA        | OBSL1    | POMT2     | RAB6B    | SOX2               | UST       |
| LOC100509655   | MGAT4A     | ODC1     | POMZP3    | RABEP1   | SOX2OT             | UTP14C    |
| LOC144438      | MGC11082   | ODF2     | PPAPDC1B  | RALBP1   | SOX4               | UTP15     |
| LOC148189      | MGC45800   | ODZ2     | PPARA     | RALGPS1  | SOX6               | UTRN      |
| LOC151146      | MGEA5      | ODZ3     | PPM1F     | RAMP1    | SP1                | VASH2     |
| LOC153811      | MGMT       | OGFOD1   | PPM1H     | RANBP2   | SRPR               | VAV3      |
| LOC285178      | MGP        | OGFRL1   | PPP1CA    | RAP1A    | SRPRB              | VPS53     |
| LOC339290      | MIB2       | OGG1     | PPP1CB    | RAP1B    | SRPX               | VPS54     |
| LOC339803      | MID2       | OIP5     | PPP2R1B   | RAP1GDS1 | SRR                | VPS8      |
| LOC339929      | MIOS       | PCLO     | PPP2R2B   | RAP2A    | SUCLG1             | WDFY3     |
| LOC375190      | MLEC       | PCNX     | PPP2R2C   | RAP2B    | SUCLG2             | WDR13     |
| LUZP6 /// MTPN | MLF1       | PCNXL2   | PPP2R3C   | RAP2C    | SURF4              | ZDHHC20   |
| MAN1A1         | MLL        | PCOLCE   | PPP2R5C   | RAPGEF1  | SUSD1              | ZNF839    |
| MAN1A2         | MLL3       | PCOLCE2  | PQLC3     | RAPGEF6  | SUSD5              | ZNF850    |
| MAN2A2         | MLLT1      | PCSK7    | PRDM1     | RAPGEFL1 | SUV420H1           | ZNHIT1    |
| MANEA          | MLLT10     | PCTP     | PRKACA    | RAPH1    | SYNJ2BP            | ZNRF3     |
| MAOA           | MLXIP      | PCYOX1   | PRKACB    | RARS2    | SYNM               | ZRANB1    |
| MAP1A          | MYLK       | PDCD4    | PRKAR1A   | RASA1    | SYNPO              | ZSCAN5A   |
| MAP1B          | MYO10      | PDCD6IP  | PRKAR2A   | RASA4    | SYNRG              | ZW10      |
| MAP1LC3A       | MYO9A      | PDDC1    | PRKAR2B   | RASGRF2  | TACC1              | ZWILCH    |
| MAP1LC3B       | MYOF       | PDE10A   | PRKCA     | RASL11B  | TACC2              | ZXDC      |
| MAP2           | MYST4      | PDE1A    | PRKCI     | RAVER2   | TACC3              | ZYG11B    |
| MAP2K5         | NAAA       | PDE1C    | PRKCSH    | RPGRIP1L | TAF1               | ZZEF1     |
| MAP2K6         | NCRNA00253 | PDE4DIP  | PRKCZ     | SDHB     | TANC2              | ZZZ3      |
| MAP3K13        | NCRNA00263 | PDHA1    | PRKD1     | SLC16A14 | TANK               |           |
| MAP3K2         | NCRNA00287 | PDHB     | PRKDC     | SLC25A39 | TAOK1              |           |
| MAP3K3         | NCRNA00294 | PDK3     | PSMD10    | SLC25A40 | TAPT1              |           |
| MAP3K4         | NCS1       | PDLIM3   | PTBP1     | SLC25A5  | TARDBP             |           |
| MAP3K5         | NDRG3      | PHGDH    | PTCD1     | SLC26A2  | TEF                |           |
| MAP3K6         | NDRG4      | PHIP     | PTCD3     | SLC2A1   | TERF1              |           |
